# Supplementary material for: Development of a Native Escherichia coli Induction System for Ionic Liquid Tolerance
Source: PLoS One. 2014 Jul 1;9(7):e101115. doi: 10.1371/journal.pone.0101115 (PMC4077768; doi:10.1371/journal.pone.0101115)
Supplement: Table S1 — Microarray results after addition of 150 mM [C2mim]Cl to exponentially growing E. coli cells. Only genes with a change in expression of three-fold or higher and a p-value<0.05 at the 30 min time-point are listed. (XLSX) [file pone.0101115.s006.xlsx]

## Sheet: Sheet1
Upregulated genes
Gene number	Gene name	Description	Fold change 30 min	P value 30 min	Fold change 60 min	P value 60 min
b4242	mgtA	Mg2+ transport ATPase, P-type 1	25.63	0.01	24.51	0.02
b3917	sbp	periplasmic sulfate-binding protein; periplasmic-binding component of ABC superfamily	16.62	0.01	14.01	0.02
b4641		pseudogene, CP4-44 putative prophage remnant	14.68	0.02	11.81	0.03
b1915	yecF	yecF	14.51	0.02	11.67	0.04
b0357	frmR	repressor of frmRAB	13.24	0.01	12.11	0.02
b1549	ydfO	Qin prophage; predicted protein	12.53	0.04	8.6	0.04
b3107	yhaL	predicted protein	12.09	0.03	8.26	0.07
b3348	slyX	host factor for lysis of phiX174 infection	11.89	0.03	8.34	0.04
b1905	ftnA	cytoplasmic ferritin (an iron storage protein)	11.52	0.02	9.65	0.03
b3728	pstS	high-affinity phosphate-specific transport system; periplasmic phosphate-binding protein; periplasmic-binding component of ABC superfamily	11.18	0.02	8.52	0.04
b0356	frmA	alcohol dehydrogenase class III; formaldehyde dehydrogenase, glutathione-dependent	11.15	0.01	9.43	0.02
b1304	pspA	phage shock protein, inner membrane protein	10.98	0.03	7.61	0.05
b1571	ydfA	Qin prophage; predicted protein	8.99	0.03	8.32	0.04
b1060	bssS	regulator of biofilm formation	7.7	0.01	7.6	0.02
b1656	sodB	superoxide dismutase, iron	7.43	0.01	8.44	0.02
b3816	corA	Mg2+ transport, system I	7.22	0.03	5.7	0.03
b3181	greA	transcription elongation factor: cleaves 3' nucleotide of paused mRNA	7.19	0.05	4.79	0.07
b1305	pspB	phage shock protein	7.11	0.04	4.61	0.08
b1531	marA	multiple antibiotic resistance; transcriptional activator of defense systems	7.02	0.02	6.25	0.02
b2669	stpA	DNA-binding protein; H-NS-like protein; chaperone activity; RNA splicing?	6.91	0.01	4.72	0.02
b2752	cysd	ATP:sulfurylase (ATP:sulfate adenylyltransferase), subunit 2	6.85	0	3.34	0.02
b0791	ybhQ	predicted inner membrane protein	6.76	0.03	4.74	0.06
b2069	yegd	putative heat shock protein	6.35	0.03	6.25	0.04
b4640		pseudogene, CP4-44 putative prophage remnant	6.12	0.04	5.42	0.03
b0877	ybjX	putative enzyme	6.08	0.02	5.48	0.02
b0961	yccF	conserved inner membrane protein	5.8	0.05	4.05	0.1
b4599	yneM	small membrane protein	5.57	0.02	4.5	0.01
b1340	smrA	conserved protein with endonuclease activity	5.53	0.01	5.03	0.02
b1743	spy	periplasmic protein related to spheroblast formation	5.38	0.03	3.95	0.05
b1826	mgrB	autoregulator of the phoPQ system	5.36	0.03	4.46	0.02
b0161	degP	periplasmic serine protease Do; heat shock protein HtrA	5.33	0.03	4.91	0.04
b1806	yeaY	putative outer membrane protein	5.28	0.05	3.17	0.13
b0399	phoB	positive response regulator for pho regulon, sensor is PhoR (or CreC)	5.17	0.04	4.09	0.09
b0841	ybjG	undecaprenyl pyrophosphate phosphatase	5.17	0.01	4.28	0.02
b1298	puuD	probable amidotransferase subunit	5.15	0.01	6.39	0.03
b1193	emtA	murein transglycosylase E	5.14	0.03	3.29	0.05
b2812	csdL	putative enzyme	5.13	0.03	3.14	0.05
b1572	ydfB	Qin prophage, small protein	5.08	0.03	5.1	0.03
b2518	ndk	nucleoside diphosphate kinase	4.87	0.05	3.33	0.05
b1306	pspC	phage shock protein: activates phage shock-protein expression	4.84	0.03	3.21	0.07
b1569	dicC	regulator of dicB	4.79	0.03	4.09	0.02
b2082	ogrK	prophage P2 ogr protein	4.69	0.03	4.11	0.05
b0393	rdgC	nucleoid associated protein	4.64	0.05	2.83	0.09
b0048	folA	dihydrofolate reductase type I; trimethoprim resistance	4.6	0.04	3.72	0.04
b2425	cysP	thiosulfate binding protein; periplasmic-binding component of ABC superfamily	4.6	0.01	2.65	0.03
b1825	yebO	predicted protein	4.6	0.04	3.58	0.06
b2840	ygeA	putative resistance proteins	4.59	0.05	2.92	0.08
b1654	grxD	glutaredoxin 4	4.57	0.01	4.73	0.02
b3526	kdgK	2-keto-3-deoxygluconokinase	4.57	0.03	4.08	0.04
b1308	pspE	phage shock protein	4.49	0.03	3.67	0.05
b4322	uxuA	D-mannonate dehydratase	4.48	0.03	3.79	0.04
b2517	rlmN	23S rRNA m2A2503 methyltransferase and tRNA m2A37 methyltransferase	4.48	0.01	4.08	0.02
b0123	cueO	multicopper oxidase with role in copper homeostasis	4.45	0.02	4.04	0.04
b1573	rzpQ	Qin prophage; predicted protein	4.43	0.03	4.62	0.03
b1568	ydfX	Qin prophage; predicted protein	4.19	0.03	4.44	0.03
b1530	marR	multiple antibiotic resistance protein; repressor of mar operon	4.12	0.02	4.26	0.02
b0699	ybfA	predicted protein	4.12	0.02	3.11	0.03
b2340	sixA	phophohistidine phosphatase	4.06	0.03	2.51	0.06
b1112	bhsA	outer membrane protein involved in copper permeability, stress resistance and biofilm formation	4.05	0.03	3.35	0.03
b1307	pspD	phage shock protein	4.04	0.03	3.54	0.03
b0386	proC	pyrroline-5-carboxylate reductase	3.88	0.02	3.39	0.02
b3461	rpoH	RNA polymerase, sigma(32) factor; regulation of proteins induced at high temperatures	3.8	0.01	4.07	0.02
b3643	rph	defective ribonuclease PH; enzyme; degradation of RNA; RNase PH; MG1655 has the rph-1 C-terminal frameshift mutation caused by a one base pair deletion of a G of the first base of codon 223 that severely reduces Rph activity; rph-1 mutation is polar on th	3.76	0.05	3.31	0.07
b1782	mipA	scaffolding protein that interacts with murein polymerase and murein hydrolase	3.76	0.04	2.78	0.03
b2562	yfhL	predicted 4Fe-4S cluster-containing protein	3.71	0.05	3.46	0.06
b2344	fadL	long-chain fatty acid transport protein (outer membrane flp protein)	3.71	0.05	3.5	0.07
b0019	nhaA	Na+/H antiporter, pH dependent	3.71	0.01	2.35	0.03
b0845	ybjJ	predicted transporter	3.71	0.01	3.36	0.02
b3184	yhbE	conserved inner membrane protein	3.68	0.04	2.27	0.04
b3995	rsd	stationary phase protein, binds sigma 70 RNA polymerase subunit	3.68	0.01	3.82	0.03
b4484	cpxP	periplasmic repressor of cpx regulon by interaction with CpxA	3.67	0.04	2.85	0.03
b0730	mngR	transcriptional regulator of succinylCoA synthetase operon	3.64	0.03	3.38	0.04
b2962	yggX	protein that protects iron-sulfur proteins against oxidative damage	3.61	0.01	3.82	0.02
b1203	ychF	ribosome-binding ATPase, inhibitor of catalase activity	3.6	0.03	3.02	0.02
b2259	pmrD	polymyxin B resistance protein	3.6	0.02	3.5	0.02
b0294	ecpR	MatA DNA-binding transcriptional dual regulator	3.59	0.03	3.37	0.02
b3618	htrL	involved in lipopolysaccharide biosynthesis	3.57	0.04	3.31	0.04
b1219	ychN	conserved protein	3.56	0.04	2.65	0.06
b0846	rcdA	RcdA DNA-binding transcriptional regulator	3.55	0.02	4.1	0.03
b0838	gstB	glutathione S-transferase B	3.55	0.01	3.19	0.03
b1622	malY	cystathionine beta-lyase; maltose regulon modulator	3.54	0.03	3	0.07
b0848	ybjM	predicted inner membrane protein	3.53	0.04	2.61	0.09
b2582	trxC	putative thioredoxin-like protein	3.51	0.03	3.24	0.03
b1829	htpX	heat shock protein, integral membrane protein	3.49	0.03	2.6	0.03
b3195	mlaF	putative ATP-binding component of a transport system	3.49	0.01	2.81	0.02
b1786	yeaJ	predicted diguanylate cyclase	3.49	0.05	2.86	0.04
b1015	putP	proline:Na+ symporter	3.48	0.03	3.28	0.03
b2105	rcnR	RcnR DNA-binding transcriptional repressor	3.47	0.03	3.28	0.03
b4656		pseudogene, novel zinc finger family	3.46	0.04	3.23	0.04
b1809	yoaB	conserved protein	3.42	0.01	3.7	0.03
b0436	tig	trigger factor; a molecular chaperone involved in cell division	3.42	0.05	2.48	0.03
b0383	phoA	alkaline phosphatase	3.41	0.04	3.13	0.07
b1930	yedF	conserved protein	3.39	0.02	3.57	0.03
b4453	ldrD	LdrD peptide of the LdrD-RdlD toxin-antitoxin system	3.39	0.05	3.32	0.04
b0405	queA	S-adenosylmethionine:tRNA ribosyltransferase-isomerase	3.38	0.03	2.46	0.04
b2895	fldB	flavodoxin 2	3.37	0.04	3.02	0.04
b3156	yhbS	predicted acyltransferase with acyl-CoA N-acyltransferase domain	3.36	0.04	2.51	0.05
b2764	cysJ	sulfite reductase (NADPH), flavoprotein beta subunit	3.34	0.03	1.94	0.06
b1205	ychH	stress-induced protein	3.3	0.02	2.43	0.02
b2700	pncC	NMN amidohydrolase	3.29	0.03	2.83	0.03
b1273	yciN	predicted protein	3.29	0.01	3.38	0.02
b1013	rutR	RutR DNA-binding transcriptional dual regulator	3.26	0.03	4.22	0.02
b0074	leuA	2-isopropylmalate synthase	3.25	0.04	3.46	0.02
b1271	yciK	putative oxidoreductase	3.23	0.04	2.82	0.04
b1839	yebY	predicted protein	3.22	0.04	3.07	0.04
b0661	miaB	isopentenyl-adenosine A37 tRNA methylthiolase	3.21	0.02	2.8	0.03
b0811	glnH	periplasmic glutamine-binding protein; permease	3.2	0.02	2.98	0.02
b3467	yhhM	putative receptor	3.16	0.02	3.12	0.03
b2114	metG	methionine tRNA synthetase	3.15	0.03	2.8	0.03
b3194	mlaE	phospholipid ABC transporter	3.12	0.04	2.75	0.04
b0967	rlmI	23S rRNA m5C1962 methyltransferase	3.1	0.03	2.47	0.04
b4326	iraD	inhibitor of σS proteolysis	3.07	0.03	3.25	0.03
b2763	cysI	sulfite reductase, alpha subunit	3.06	0.05	2.06	0.12
b4062	soxS	regulation of superoxide response regulon	3.06	0.02	1.74	0.04
b2714	ascG	ascBF operon repressor	3.05	0.04	2.33	0.08
b3175	secG	protein export - membrane protein	3.05	0.04	2.15	0.06
b1749	xthA	exonuclease III	3.04	0.04	2.68	0.1
b3703	rpmH	50S ribosomal subunit protein L34	3.04	0.05	2.08	0.11
b2311	ubiX	3-octaprenyl-4-hydroxybenzoate decarboxylase together with UbiG	3.03	0.03	2.54	0.07
b2581	yfiF	predicted methyltransferase	3.03	0	3.15	0.02
b3021	mqsA	MqsA antitoxin of the MqsRA toxin-antitoxin system and DNA-binding transcriptional repressor	3	0.05	2.74	0.03
Downregulated genes
Gene number	Gene name	Description	Fold change 30 min	P value 30 min	Fold change 60 min	P value 60 min
b3829	metE	tetrahydropteroyltriglutamate methyltransferase	0.04	0.01	0.04	0.02
b2942	metK	methionine adenosyltransferase 1 (AdoMet synthetase); methyl and propylamine donor, corepressor of met genes	0.06	0.03	0.08	0.03
b1887	cheW	positive regulator of CheA protein activity	0.06	0.01	0.17	0.03
b4567	yjjZ	predicted protein	0.07	0.03	0.13	0.04
b1882	cheY	chemotaxis regulator transmits chemoreceptor signals to flagelllar motor components	0.08	0.01	0.24	0.02
b2392	mntA	Mn(2+) / Fe(2+): H+ symporter MntH	0.1	0.03	0.14	0.05
b4292	fecR	regulator for fec operon, periplasmic	0.12	0.02	0.16	0.03
b1881	cheZ	chemotactic response; CheY protein phophatase; antagonist of CheY as switch regulator	0.12	0	0.28	0.03
b4293	fecI	probable RNA polymerase sigma factor	0.13	0.03	0.12	0.02
b3783	rho	transcription termination factor Rho; polarity suppressor	0.13	0.01	0.15	0.02
b0586	entF	ATP-dependent serine activating enzyme (may be part of enterobactin synthase as component F)	0.13	0.04	0.21	0.05
b3337	bfd	bacterioferritin-associated ferredoxin	0.13	0.03	0.18	0.04
b1888	cheA	sensory transducer kinase between chemo- signal receptors and CheB and CheY	0.13	0.01	0.31	0.03
b4493		pseudogene, GAP dehydrogenase glyceraldehyde-3-phosphate dehydrogenase (second fragment)	0.13	0.03	0.19	0.04
b4511	ybdZ	MbtH-like protein that enhances the catalytic function of EntF	0.14	0.05	0.21	0.07
b2676	nrdF	ribonucleoside-diphosphate reductase 2, beta chain, frag	0.14	0.03	0.16	0.03
b2675	nrdE	ribonucleoside-diphosphate reductase 2, α subunit dimer	0.16	0.04	0.2	0.08
b3005	exbD	uptake of enterochelin; tonB-dependent uptake of B colicins	0.16	0.04	0.26	0.06
b3005	exbD	uptake of enterochelin; tonB-dependent uptake of B colicins	0.16	0.04	0.26	0.06
b1260	trpA	tryptophan synthase, alpha protein	0.17	0.05	0.27	0.02
b1260	trpA	tryptophan synthase, alpha protein	0.17	0.05	0.27	0.02
b2153	folE	GTP cyclohydrolase I monomer	0.17	0.03	0.21	0.04
b2153	folE		0.17	0.03	0.21	0.04
b1261	trpB	tryptophan synthase, beta protein	0.18	0.04	0.24	0.02
b3161	mtr	tryptophan-specific transport protein	0.18	0.02	0.18	0.03
b0585	fes	enterochelin esterase	0.19	0.03	0.23	0.07
b1883	cheB	response regulator for chemotaxis (cheA sensor); protein methylesterase	0.19	0.02	0.38	0.04
b1264	trpE	anthranilate synthase component I	0.19	0.04	0.21	0.02
b4367	fhuF	acts in reduction of ferrioxamine B iron	0.19	0.03	0.26	0.05
b3509	hdeB	acid stress chaperone	0.2	0.04	0.2	0.04
b0126	can	putative carbonic anhdrase	0.21	0.05	0.29	0.06
b0199	metN	D- and L-methionine transport protein (ABC superfamily, atp_bind)	0.21	0.01	0.2	0.02
b1885	tap	methyl-accepting chemotaxis protein IV, peptide sensor receptor	0.22	0.02	0.42	0.06
b2673	nrdH	glutaredoxin-like protein; hydrogen donor	0.22	0.05	0.32	0.08
b3204	ptsN	phosphotransferase system enzyme IIA, regulates N metabolism	0.23	0.04	0.42	0.12
b2479	gcvR	transcriptional regulation of gcv operon	0.23	0.05	0.35	0.06
b1263	trpD	anthranilate synthase component II, glutamine amidotransferase and phosphoribosylanthranilate transferase	0.24	0.05	0.28	0.02
b1084	rne	RNase E, membrane attachment, mRNA turnover, maturation 5S RNA	0.25	0.04	0.43	0.1
b1493	gadB	glutamate decarboxylase isozyme	0.26	0.04	0.21	0.02
b0197	metQ	D-methionine transport protein (ABC superfamily, peri_bind)	0.26	0.02	0.24	0.02
b3517	gadA	glutamate decarboxylase isozyme	0.26	0.03	0.19	0.01
b1492	gadC	Transporter: glutamic acid:4-aminobutyrate antiporter	0.26	0.04	0.19	0.02
b3506	slp	outer membrane protein induced after carbon starvation	0.26	0.04	0.26	0.03
b3734	atpA	membrane-bound ATP synthase, F1 sector, alpha-subunit	0.27	0.05	0.41	0.07
b0124	gcd	quinoprotein glucose dehydrogenase	0.27	0.05	0.41	0.1
b4111	proP	low-affinity transport system; proline permease II	0.28	0.05	0.4	0.08
b1884	cheR	response regulator for chemotaxis; protein glutamate methyltransferase	0.28	0.02	0.52	0.03
b0893	serS	serine tRNA synthetase; also charges selenocystein tRNA with serine	0.28	0.04	0.35	0.04
b0658	ybeX	putative transport protein	0.28	0.03	0.3	0.06
b1102	fhuE	outer membrane receptor for ferric iron uptake	0.28	0.05	0.36	0.06
b1818	manY	PTS enzyme IIC, mannose-specific	0.28	0.03	0.42	0.03
b1819	manZ	PTS enzyme IID, mannose-specific	0.28	0.04	0.41	0.04
b2795	ygdH	conserved protein	0.28	0.02	0.39	0.03
b3608	gpsA	glycerol-3-phosphate dehydrogenase	0.28	0.04	0.36	0.1
b3732	atpD	membrane-bound ATP synthase, F1 sector, beta-subunit	0.28	0.04	0.38	0.04
b3510	hdeA	HdeA dimer, inactive form of acid-resistance protein	0.29	0.03	0.28	0.03
b1685	ydiH	predicted protein	0.29	0.05	0.42	0.07
b2642	yfjW	CP4-57 prophage; predicted inner membrane protein	0.3	0.01	0.54	0.06
b3203	hpf	hibernation promoting factor	0.3	0.05	0.4	0.06
b0707	ybgA	conserved protein	0.31	0.05	0.36	0.07
b1981	shiA	shikimate:H+ symporter	0.31	0.05	0.34	0.03
b3008	metC	L-cysteine desulfhydrase / cystathionine-β-lyase	0.32	0.01	0.36	0.03
b2210	mqo	malate:quinone oxidoreductase	0.32	0.05	0.4	0.08
b1014	putA	proline dehydrogenase, P5C dehydrogenase	0.32	0.03	0.31	0.03
b1817	manX	PTS enzyme IIAB, mannose-specific	0.32	0.04	0.43	0.07
b4173	hflX	GTP - binding subunit of protease specific for phage lambda cII repressor	0.32	0.05	0.41	0.09
b0212	gloB	probable hydroxyacylglutathione hydrolase	0.33	0.04	0.44	0.06
b0051	rsmA	16S rRNA m62A1518,m62A1519 dimethyltransferase	0.34	0.05	0.39	0.04
b3513	mdtE	MdtEF-TolC multidrug efflux transport system - membrane fusion protein	0.34	0.03	0.18	0.03
